# Supplementary material
Source: publisher figshare collection journal article supplement (https://acs.figshare.com/ndownloader/files/4716208)
Supplement: Supplementary file 1 [file 4716208]

## Supporting Information

# Correlations between Crystallite/Particle Size and Photoluminescence Properties of Submicron Phosphors

*Wei-Ning Wang<sup>1</sup>, W. Widiyastuti<sup>1</sup>, Takashi Ogi<sup>1</sup>, I. Wuled Lenggoro<sup>2</sup>, and Kikuo Okuyama<sup>1\*</sup>*

1. Department of Chemical Engineering, Graduate School of Engineering,

Hiroshima University, Higashi Hiroshima, 739-8527, Japan

2. Institute of Symbiotic Science and Technology, Tokyo University of Agriculture and Technology, 2-

24-16 Naka-cho, Koganei, Tokyo, 184-8588, Japan

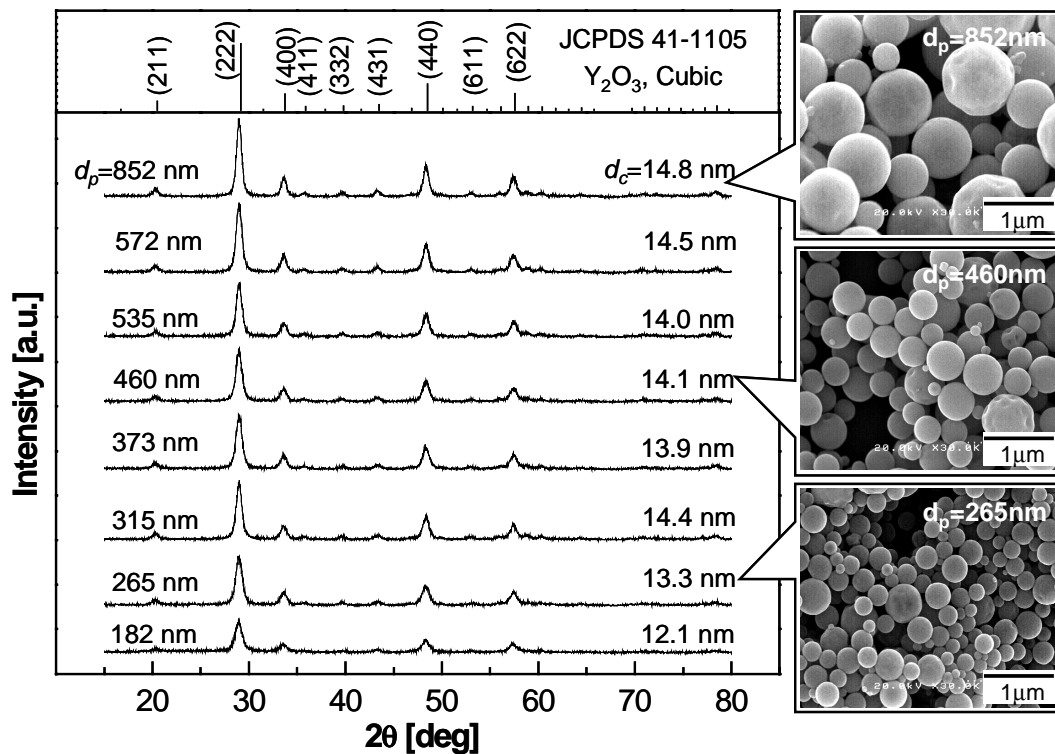

Figure S1. X-ray diffraction (XRD) patterns (left) and field emission scanning electron microscopy (FE-SEM) images (right) of annealed  $\text{Y}_2\text{O}_3:\text{Eu}^{3+}$  particles from precursors with various concentrations at 1000 °C

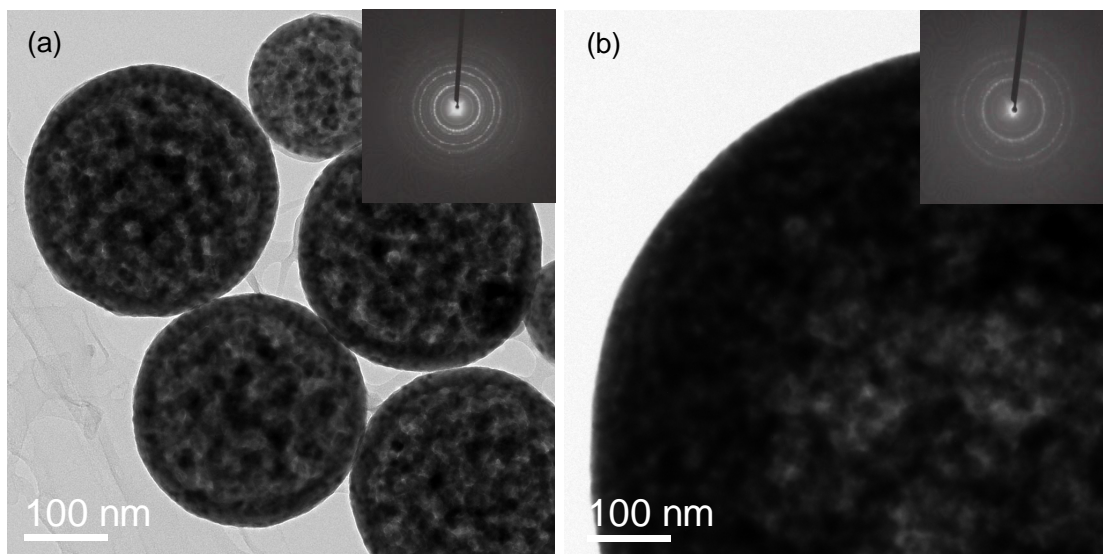

Figure S2. Transmission electron microscopy (TEM) images of two  $\text{Y}_2\text{O}_3:\text{Eu}^{3+}$  samples, Y-9 (a) and Y-11 (b), with the particle sizes of 265 nm, and 852 nm; crystallite sizes of about 13.3 nm and 14.8 nm, respectively; the inserts in both images are the selected area electron diffraction (SAED) patterns

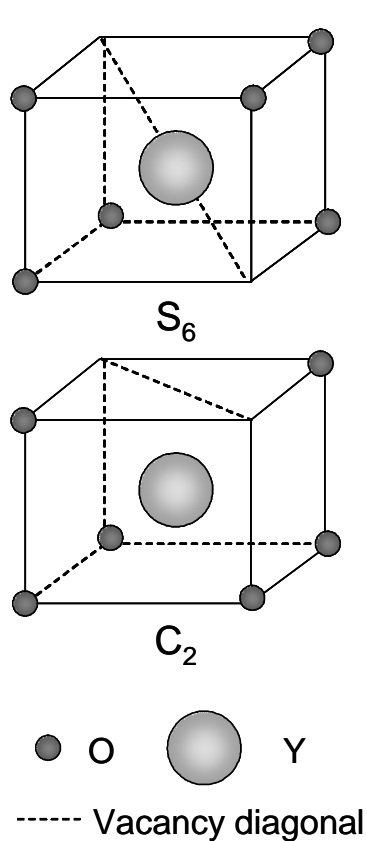

(a)

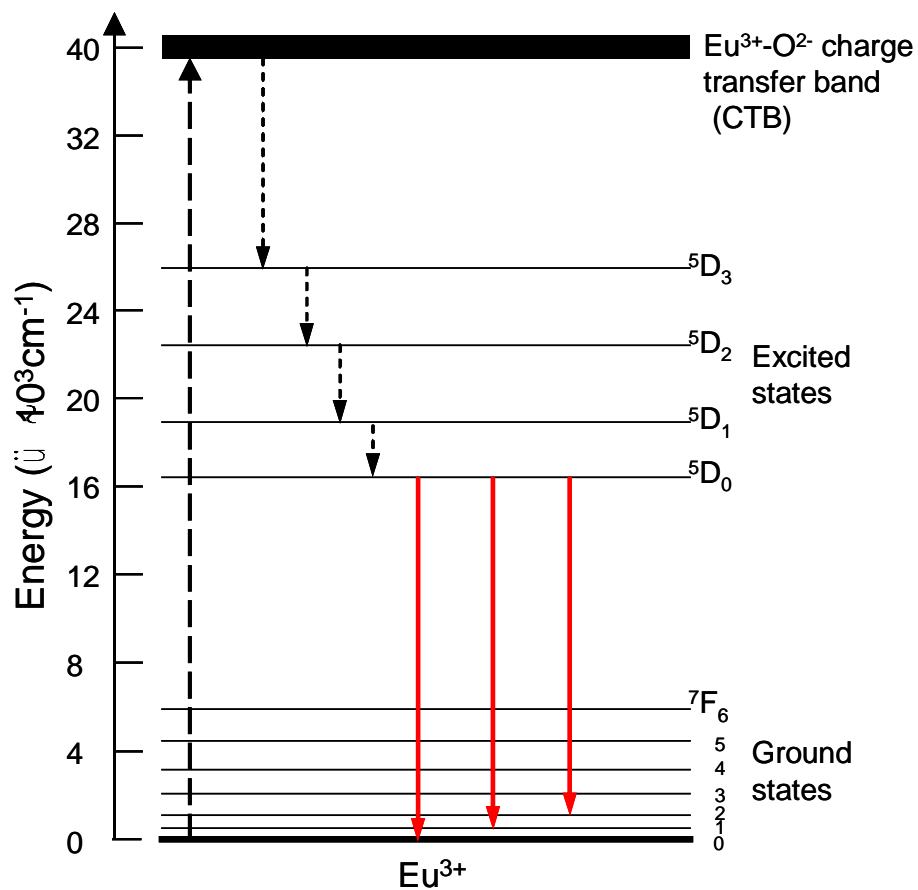

(b)

**Figure S3. Schematic diagram of two crystallographic sites of  $Y^{3+}$  in  $Y_2O_3:Eu^{3+}$ : One is the  $S_6$  site with inversion symmetry, and the other is the  $C_2$  site (a); Energy level diagram of the  $4f^6$  configuration of the  $Eu^{3+}$  ion in the cubic  $Y_2O_3$  lattice (b)**

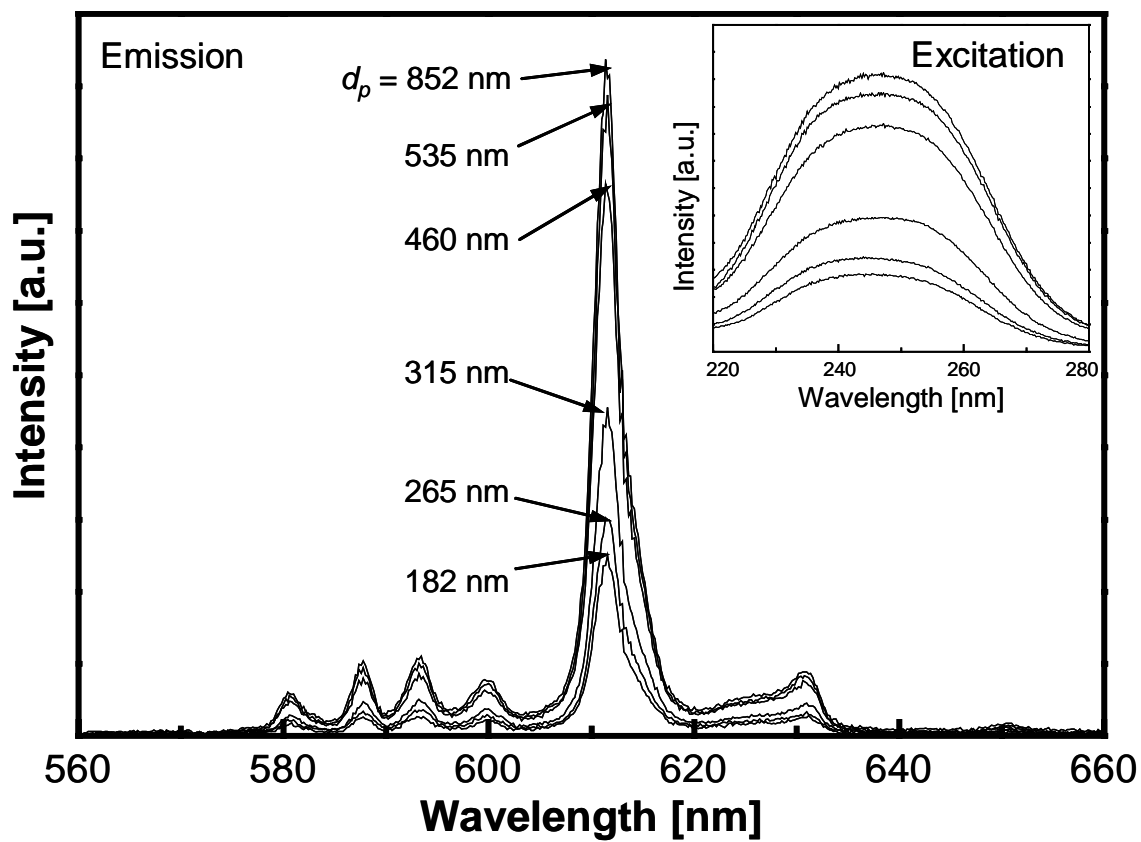

**Figure S4.** Photoluminescence emission and excitation (insert) spectra of  $\text{Y}_2\text{O}_3:\text{Eu}^{3+}$  powders with different particle sizes at a constant crystallite size
